# Supplementary material
Source: Oxford University Press journal article supplement (doi:10.1093/g3journal_jkac124)

Light microscopy (400x)

Masked images

CBS 147323

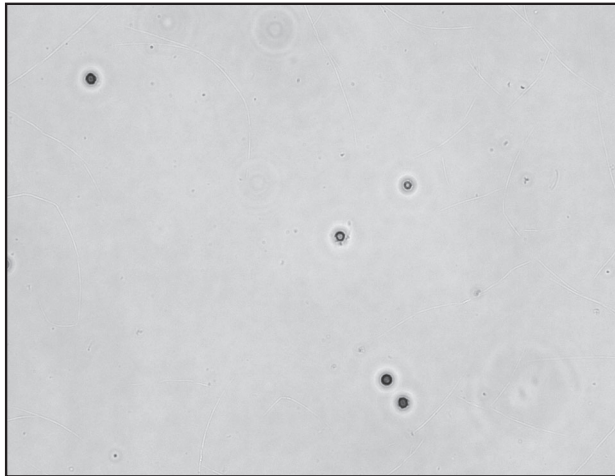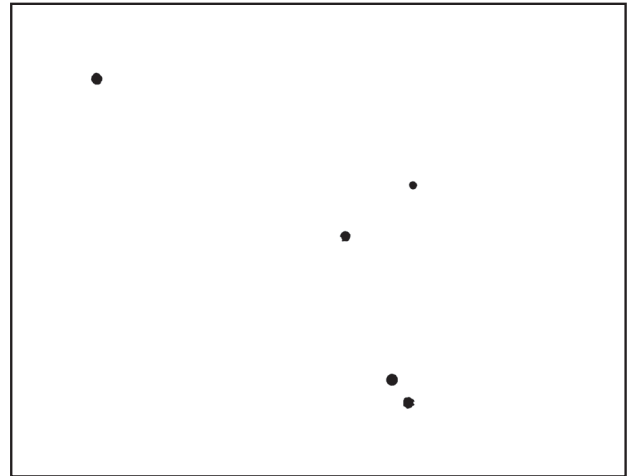

CBS 147347

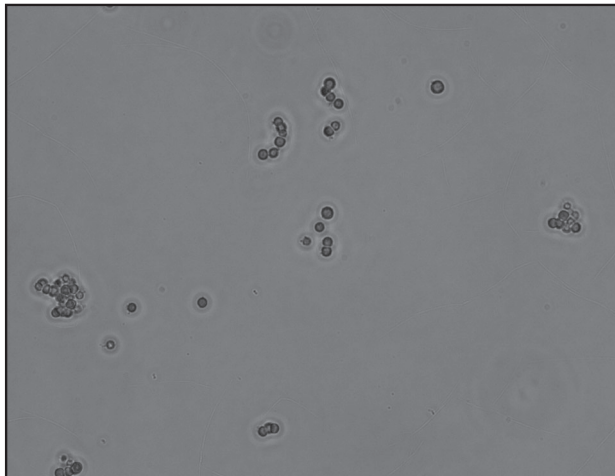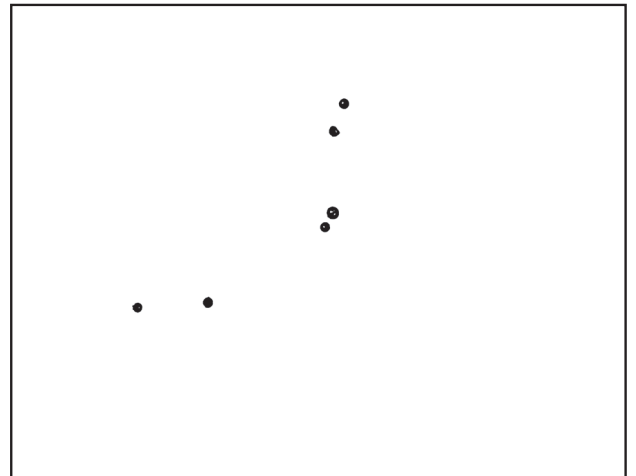

SJS150.1

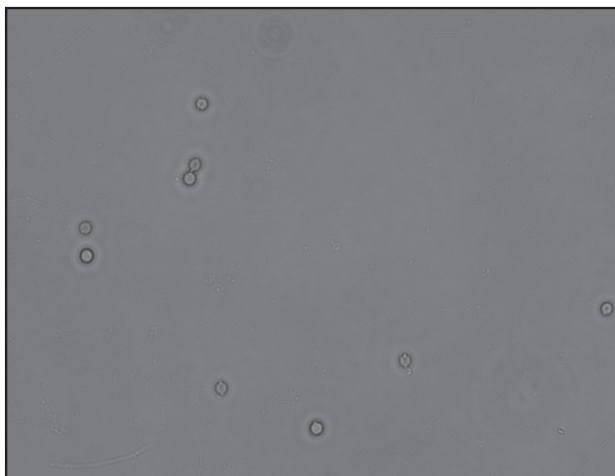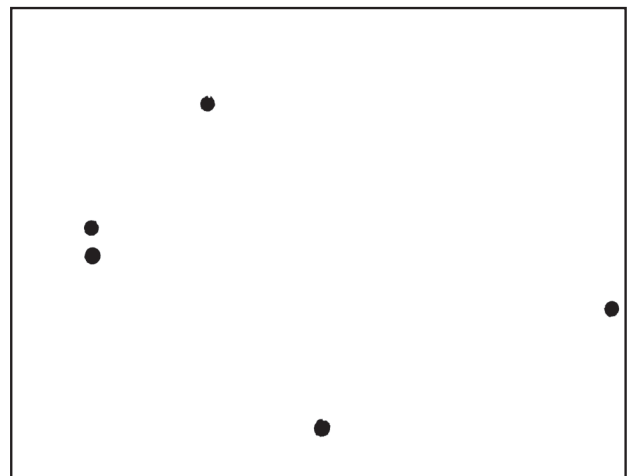

Supplement: jkac124_figure_s2.pdf [file jkac124_figure_s2.pdf]
