# Supplementary material
Source: Oxford University Press journal article supplement (doi:10.1093/g3journal_jkac124)

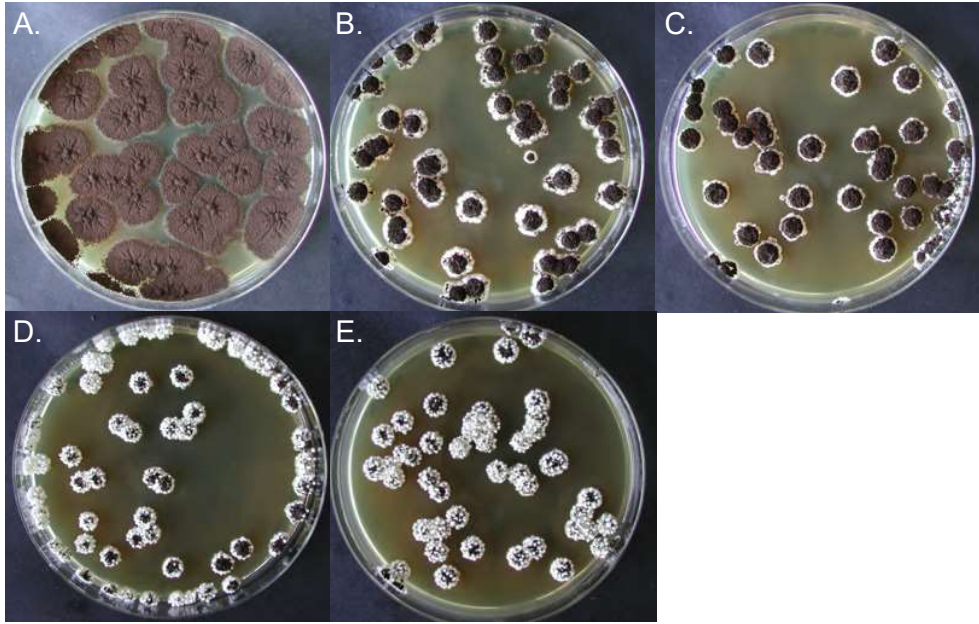

Supplement: jkac124_figure_s3.pdf [file jkac124_figure_s3.pdf]
