# Supplementary material
Source: Oxford University Press journal article supplement (doi:10.1093/g3journal_jkac124)

Control

+1% triton

Control

+1% triton

N402

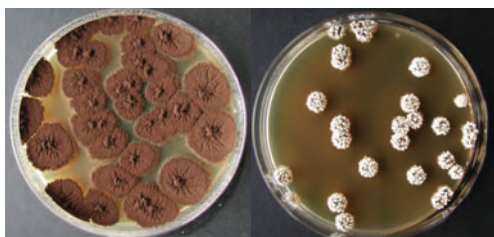

CBS 147323

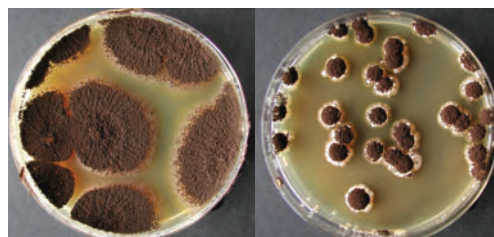

N400

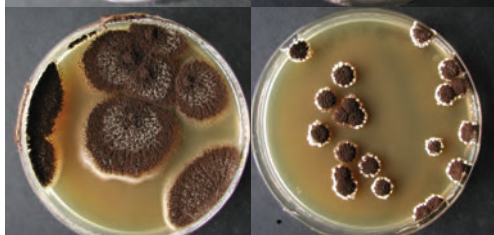

CBS 115989

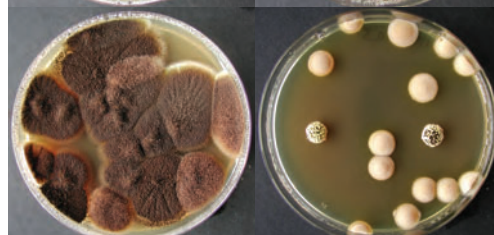

CBS 124.48

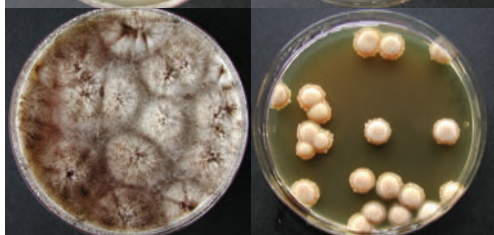

CBS 147346

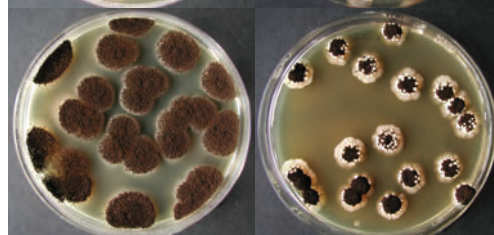

CBS 112.32

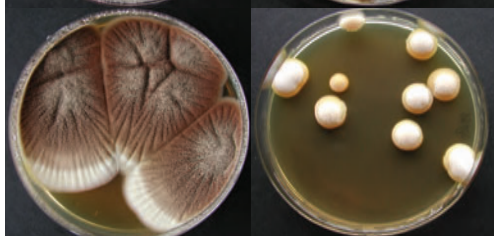

CBS 147347

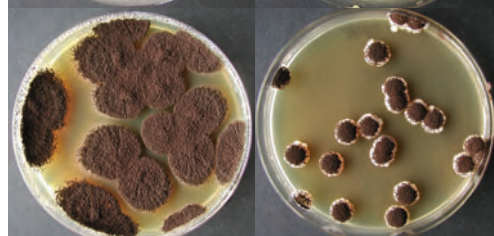

CBS 769.97

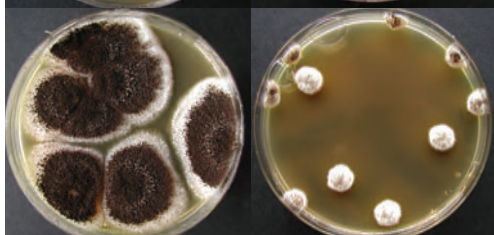

CBS 147345

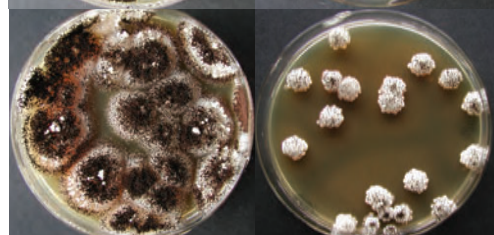

Supplement: jkac124_figure_s4.pdf [file jkac124_figure_s4.pdf]
